# Supplementary material
Source: PubMed Central journal article supplement (PMC3705908)
Supplement: NIHMS72320-supplement-supplementary.pdf [file NIHMS72320-supplement-supplementary.pdf]

## Supplemental Data

### Regulation of In Situ to Invasive

#### Breast Carcinoma Transition

Min Hu, Jun Yao, Danielle K. Carroll, Stanislaw Weremowicz, Haiyan Chen, Daniel Carrasco, Andrea Richardson, Shelia Violette, Tatiana Nikolskaya, Yuri Nikolsky, Erica L. Bauerlein, William C. Hahn, Rebecca S. Gelman, Craig Allred, Mina J. Bissell, Stuart Schnitt, and Kornelia Polyak

#### SUPPLEMENTAL EXPERIMENTAL PROCEDURES

##### Cluster and gene ontology enrichment analysis of SAGE libraries

Differentially expressed tags ( $P < 0.05$ ) between ITGB6+ and MUC1+ SAGE libraries from MCFDCIS xenografts were generated by Poisson analysis (available at <http://genome.dfci.harvard.edu/sager/>) (Cai et al., 2004). Normalized tag counts per 50,000 from these two libraries were combined with those from human breast epithelial and myoepithelial libraries (N-EPI-1, N-EPI-2, N-MYOEP-1, N-MYOEP-2, N-MYOEP-4, D-EPI-2, D-EPI-3, D-EPI-6, D-EPI-7, D-MYOEP-6, and D-MYOEP-7). Tags were further filtered to have a maximum count from all libraries above 10 per 50,000 and to have a >1.5 fold difference between ITGB6 and MUC1 libraries. Filtered data were log transformed and clustered (hierarchical, complete linkage) using the Cluster and TreeView software (Eisen et al., 1998). Color settings were adjusted to set tag count 4 per 50,000 as black. Tag counts below 4 were green and above 4 were red. Gene ontology enrichment scores for the SAGE libraries were calculated as  $-\log(p\text{-value})$  by comparing the significantly highly expressed genes in each cell type (ITGB6+ and MUC1+, or Myoep and Epi) analyzed to the background (all genes in the ITGB6+/MUC1+ libraries, or for human breast libraries, all genes with tag count  $\geq 10$  per 100K in at least one library) with one-sided Fisher test.

##### Selection of gene list for Table 1

Genes were selected based on the following criteria: (1) statistically significant ( $p < 0.05$ ) difference between ITGB6+ and MUC1+ libraries; (2) statistically significant ( $p < 0.05$ ) difference between human MYOEP and EPI groups based on t-test or Wilcoxon test (for genes high in ITGB6+ and MYOEP or MUC1+ and EPI), or ratio of DMYOEP/NMYOEP  $\geq 10$ -fold (for genes high in ITGB6+ and DMYOEP); (3) ratio of ITGB6+/MUC1+ and MYOEP/EPI are in the same direction; (4) ratio of both ITGB6+/MUC1+ and MYOEP/EPI are  $\geq 2$ -fold; and (5) tag count  $\geq 10$  per 100k in at least one of the primary human tissue libraries.

##### FISH analysis

For MYC FISH LSI C-MYC (Spectrum Orange), LSI MYC Dual Color Break Apart Probe (5' Spectrum Orange, 3' Spectrum Green), CEP8 (Spectrum Aqua and Spectrum Green), and CEP10 (Spectrum Aqua) probes were purchased from Vysis, Inc. (Downers Grove, IL). Cells were treated with colcemid, harvested, and used for metaphase chromosome spreads preparations according to standard protocols. Hybridization of metaphase chromosomes was performed as previously described (Ney et al., 1993). Slides were examined using a fluorescence microscope equipped with a CytoVysion capturing system (Applied Imaging Corp., San Jose, CA).

##### Immuno-FISH (iFISH) using formalin fixed paraffin embedded tissue

The procedure is a modification of a protocol provided by Peters et al. (Peters et al., 2005).

##### **I. Deparaffinization and Pretreatment**

1. Bake the slides in 60°C oven for 2 hrs.
2. Xylene 3x 10 min.
3. (Optional) EZ-DeWax 10 min.
4. 100% EtOH 2x 3 min.
5. 70% EtOH 1x 3 min.
6. 50% EtOH 1x 3 min.
7. H<sub>2</sub>O 2x 3 min.
8. 1x citrate buffer (dilution of 20x in H<sub>2</sub>O) @ 70°C overnight (16 - 18 hrs), cool down to RT (30 - 45 min).
9. H<sub>2</sub>O 2x 3 min. Use PAP pen to mark the tissue area.
10. PBST 1x 3 min.

## II. Immunofluorescence (skip steps 9-17 if only perform FISH)

11. PBS +10% goat serum @ RT for 30 min in a humid chamber.
12. 1° antibody (CK, SMA, CD44) diluted (1/50-1/100) in PBS+5% goat serum @ RT for 1 hr.
13. PBST 3x 3 min.
14. Biotin conjugated goat-anti-mouse 2° antibody diluted (1/100 of 1 mg/ml) in PBS @ RT for 30 min.
15. PBST 3x 3 min.
16. Pacific-blue conjugated streptavidin diluted (1/100 of 1 mg/ml) in PBS @ RT for 30 min in the dark. Prepare Carnoy's, chill on ice or @ -20°C.
17. PBS 3x 3 min.
18. H<sub>2</sub>O 1x 3 min.
19. Post-fix in ice-cold Carnoy's for 10 min. Prepare Denaturation solution, heat @ 75°C. Prepare ice-cold 70%, 85% and 100% EtOH.
20. H<sub>2</sub>O 1x 3 min.
21. 70% EtOH 1x 3 min.
22. 85% EtOH 1x 3 min.
23. 100% EtOH 1x 3min.
24. Air dry for 10 min.

## III. FISH

25. Label DNA probes using Nick Translation

A. Label cells of different species of origin.

- Prechill microcentrifuge tubes on ice

|                                                  |         |
|--------------------------------------------------|---------|
| 1 µg Human or Mouse Cot-1 DNA                    | 1 µl    |
| dH <sub>2</sub> O                                | 23.5 µl |
| 1 mM SpectrumGreen/Red dUTP                      | 0.5 µl  |
| 0.1 mM dTTP (1:3 dilution of 0.3 mM stock)       | 5 µl    |
| 0.1 mM dATP, dCTP, dGTP mix (equal volume of ea) | 10 µl   |
| 10x nick translation buffer                      | 5 µl    |
| Nick translation enzyme                          | 5 µl    |

- Incubate @ 15°C for 16 hrs. Can also test conditions with 5 µl enzyme/8 hrs, 10 µl enzymes/8 hrs, and 10 µl enzyme/16 hrs. Probe should be 300 bp – 3 Kb size by gel electrophoresis.
- Stop the reaction @ 70°C for 10 min. Chill on ice.
- Pool samples if doing multiple batches (n). Ethanol precipitation:  
nx 50 µl sample

nx 5  $\mu$ l 3M sodium acetate  
4  $\mu$ l glycogen  
nx 125  $\mu$ l 100% EtOH

- Vortex briefly. Place on dry ice for 15 min.
- Cf @ 14K, 4°C for 30 min.
- Wash with 2x 1 ml 70% EtOH.
- Resuspend pellet in nx 15  $\mu$ l dH<sub>2</sub>O + nx 35  $\mu$ l CGH hybridization buffer. Store @ -20°C in the dark.
- Mix 1:1 (v:v) human and mouse probe, denature @ 75°C for 5 min (when the slides are being dehydrated in 85% EtOH below), chill on ice, spin down briefly.

### **B. Hybridization with BAC probe.**

- Perform the Nick Translation reaction the same as above, but use 1  $\mu$ g BAC DNA per 50  $\mu$ l reaction.
- Stop the reaction; add 10  $\mu$ g unlabeled Cot-1 DNA per 50  $\mu$ l reaction, and ethanol precipitate.
- Resuspend pellet with 1.5  $\mu$ l labeled CEP probe (of different color from BAC probe), 13.5  $\mu$ l dH<sub>2</sub>O and 35  $\mu$ l CGH hybridization buffer.

#### 26. Hybridize the probe

- Rinse slides in H<sub>2</sub>O 3x 1 min.
- Denaturation solution @ 75°C for 5 min.
- Ice cold 70% EtOH 1x 3 min.
- Ice cold 85% EtOH 1x 3 min.
- Ice cold 100% EtOH 1x 3 min.
- Dry @ 42°C for 1 min.
- Apply desired amount of denatured probe mix onto tissue section, cover w/ a piece of parafilm and seal w/ coverslips with rubber seal on edges.
- Incubate @ 37°C overnight (20 - 24 hrs) in a sealed humid chamber.

#### 27. Wash

- Remove coverslips and parafilm. Place slides in 0.4x SSC/0.3% NP-40 wash solution @ RT for 2 min.
- 0.4x SSC/0.3% NP-40 wash solution (pre-heat for 30 min) @ 74°C for 2 min.
- 2x SSC/0.1% NP-40 wash solution @ RT for 2 min.
- H<sub>2</sub>O 1x 3 min.
- 2x SSC 1x 3 min.
- For Cot1 DNA probe, counterstain w/ DAPI diluted (1:10,000 of 1 mg/ml) in 2x SSC @ RT for 5 min in the dark. For BAC DNA and CEP probes, use DAPI II counterstain. (If use pacific blue, skip this step and 2x SSC washes).
- 2x SSC 1x 3 min.
- H<sub>2</sub>O 1x 3 min.
- Place slides on their side to drain and wipe off H<sub>2</sub>O around tissue.
- Apply anti-fade mounting solution onto section and add glass cover. Remove excess mounting media and seal with clear nail polish. Store @ 4°C in the dark.

### **Reagents:**

*EZ-DeWax*: Biogenex #HK585-5K

*20x Citrate buffer pH 6.0*: Zymed Labs #00-5000

*Human Cot-1 DNA*: Invitrogen # 15279-011 (predominantly 50 to 300 bp in size and enriched for repetitive DNA sequences)

*Mouse Cot-1 DNA*: Invitrogen # 18440-016 (predominantly 50 to 300 bp in size and enriched for repetitive DNA sequences)

*SpectrumGreen-dUTP*: VYSIS # 30-803200

*SpectrumRed-dUTP*: VYSIS # 30-803400

*Nick translation kit*: VYSIS # 32-801300

*CEP Hybridization Buffer*: VYSIS # 32-804828

*DAPI*: Invitrogen # D1306.

*DAPI II Counterstain*: VYSIS # 32-804831 (contains antifade solution)

*Antifade Solution*: VYSIS # 32-804029

*Mouse anti-human cytokeratin*: DakoCytomation # M 3515

*Mouse anti-human smooth muscle actin*: DakoCytomation # M 0851

*CD44 Mouse Monoclonal Antibody*: NeoMarkers # MS-668-P1.

*Biotin conjugated Goat anti-Mouse IgG (H+L)*: PIERCE # 31800

*Streptavidin, Pacific Blue conjugate*: Invitrogen # S-11222

### **10x PBS**

80 g NaCl

2 g KCl

11.5 g Na<sub>2</sub>HPO<sub>4</sub>

2 g KH<sub>2</sub>PO<sub>4</sub>

dH<sub>2</sub>O to 1 L

pH 7.4

### **PBST** (1x PBS/0.05% Tween 20)

100 ml 10x PBS

5 ml 10% Tween-20

895 ml dH<sub>2</sub>O

### **Carnoy's** (3:1 EtOH:acetic acid)

36 ml 100% EtOH

12 ml glacial acetic acid

Make fresh

### **20x SSC** (3.0 M NaCl, 0.3 M sodium citrate)

175.32 g NaCl

88.23 g sodium citrate

H<sub>2</sub>O to 1 liter

pH 7.0 unless specified

### **Denaturation solution** (70% deionized formamide, 2x SSC)

35 ml formamide

5 ml 20x SSC pH 5.3

10 ml H<sub>2</sub>O

Make fresh

### **0.4x SSC/ 0.3% NP-40 wash solution**

20 ml 20x SSC

3 ml NP-40

H<sub>2</sub>O to 1 liter  
pH 7.0-7.5

**2x SSC/ 0.1% NP-40 wash solution**

100 ml 20x SSC  
1 ml NP-40  
H<sub>2</sub>O to 1 liter  
pH 7.0-7.5

**Anti-fade mounting solution** (or use the commercial one)

0.7 g DABCO in 2.4 ml H<sub>2</sub>O  
600 µl 1M Tris, pH 8.0  
Vortex to dissolve  
Add 27 ml glycerol, mix by inversion  
Store in the dark @ 4°C

**Immunohistochemistry using formalin fixed paraffin embedded tissue**

**Tissue Preparation and Pretreatment**

1. Deparaffinize and Rehydrate:

Heat slides in 60-65°C oven for 2 hrs (to soften wax and stick tissue onto slides).

Xylene 3x 10 min; 100% EtOH 2x 4 min; 85% EtOH 1x 4 min; 70% EtOH 1x 4 min; 50% EtOH 1x 4 min; H<sub>2</sub>O 2x 3 min.

2. Target Retrieval:

- Heat induced epitope unmasking: pre-heat the following solutions, immerse room temperature tissue sections in and incubate for additional 20 min in steamer, then cool slides in running water to RT.

(a) 1x antigen retrieval citra plus solution.

(b) 1x target retrieval solution pH 9 (10 mM Tris Base, 1 mM EDTA, pH 9.0).

(c) 1 mM EDTA pH 8.0.

- Proteolytic digestion:

(d) Pepsin for 5 min at 37°C.

(e) Proteinase K 15 min at 37°C.

3. 3x 3min H<sub>2</sub>O; (Optional) 3% H<sub>2</sub>O<sub>2</sub> for 10 min to block endogenous peroxidase activity (most commonly encountered in red blood cells, kidney, and liver tissue), 2x 3min H<sub>2</sub>O.

4. 1x 3 min in PBS or TBS, use PAP pen to mark the tissue area. Dip slides in PBST or TBST (so later applied solution will easily spread over the section; could reuse).

**Immunohistochemistry**

1. Block with 10% normal serum (heat inactivated and filtered) from the same host species as the secondary antibodies in PBST or TBST at RT for 30 min to reduce background from non-specific, conserved-sequence, and/or Fc-receptor bindings.

2. (Optional) Tap off blocking buffer, wash 1x 3 min in PBST or TBST to remove any free biotin from the serum; block endogenous biotin with 2-3 drops of Avidin solution for 15 min, wash 1x 3 min in PBS or TBS, dip slides in PBST or TBST; then block remaining biotin-binding sites on the avidin with Biotin solution for 15 min. Tap off. Dip slides in PBST or TBST (could reuse). It is recommended to block endogenous biotin, biotin receptors, or avidin binding sites present in certain tissues rich in biotin, such as liver, kidney, and GI tract.

3. Apply primary antibody (diluted in 5% normal serum/PBST or TBST). Incubate at RT 1 hr or 4°C overnight in humid box. Most antibodies work fine with 4°C overnight incubation. To assay background, use isotype matched control IgG from the same species on spare slides.
4. Wash 4x 3 min in PBST or TBST with agitation.
5. Incubate with biotinylated secondary antibody (1:400-1:200 in PBST or TBST) at RT in a humid box for 30 min. It is said that using TBS to dilute 2° Ab often produces weaker staining. So use TBS only for Abs with high background staining. Do not use BSA or other serum containing reagents to dilute secondary antibodies since they may bind to BSA or serum therefore reducing antibody affinity.
6. During 2° incubation time, make A+B mix by adding 20 µl A to 1 ml PBS, vortex, then add 20 µl B, vortex, sit 30 min at RT before applying to slides.
7. Wash slides 4x 3 min in PBST or TBST.
8. Incubate in A+B 30 min at RT.
9. Wash 3x 3 min in PBS.
10. Prepare DAB by adding one DAB tablet and one urea-peroxide tablet in 5 ml H<sub>2</sub>O, vortex to dissolve. Then add 25 µl 8% NiCl<sub>2</sub>, vortex and filter (0.45 µm).
11. Incubate with DAB substrate for 5-30 min at RT. As soon as color developed, immerse slides in H<sub>2</sub>O.
12. Counterstain in 0.5% methyl green for 5-30 min at RT. 60°C may produce stronger stain.
13. Wash in 100% ETOH.
14. Rinse in Xylene.
15. Mount with Cytoseal. Apply coverslips.

#### **Buffer recipes:**

10x PBS: 80 g NaCl, 2 g KCl, 11.5 g Na<sub>2</sub>HPO<sub>4</sub> and 2 g KH<sub>2</sub>PO<sub>4</sub> to 1 L dH<sub>2</sub>O, pH 7.4.

PBST (1x PBS/0.05% Tween 20): 100 ml 10x PBS, 5 ml 10% Tween-20 to 895 ml dH<sub>2</sub>O.

20x TBS: 60.57 g Trizma® base (C<sub>4</sub>H<sub>11</sub>NO<sub>3</sub>) and 175.32 g NaCl to 1 L dH<sub>2</sub>O, pH 7.6.

TBST (1x TBS/0.05% Tween 20): 50 ml 20x TBS, 5 ml 10% Tween-20 to 945 ml dH<sub>2</sub>O.

1 mM EDTA: 0.372 g Na<sub>2</sub>EDTA•2H<sub>2</sub>O to 1 L dH<sub>2</sub>O, pH 8.0.

Pepsin (DakoCytomation #S3002): 2 g to 500 ml 0.01 M HCl (pH 2), aliquot and store at -20°C. Thaw prior to use.

Proteinase K (Puregene #D-50K5): 20 µg/ml (1:1000) in TE Buffer (50mM Tris Base, 1mM EDTA, pH 8). Optimum pH 7.5-10.

0.5% (w/v) Methyl Green (Sigma # M-8884): 5 g to 1L dH<sub>2</sub>O or 0.1 M sodium acetate pH 4.2.

#### **Reagents:**

Citrate buffer pH 6.0, 20x: Zymed Labs # 00-5000 (58.82 g Na<sub>3</sub>Citrate•2H<sub>2</sub>O/L, pH 6.0).

Antigen Retrieval Citra Plus, 10x: BioGenex # HK080-9K.

Target Retrieval Solution, 10x: DakoCytomation # S1699 (19.21 g Citric acid anhydrous, 7.44 g Na<sub>2</sub>EDTA•2H<sub>2</sub>O, 50 ml 10% Tween-20/L, pH 6.1).

Target Retrieval Solution, pH 9, 10x: DakoCytomation # S2367 (12.1 g Tris Base, 3.72 g Na<sub>2</sub>EDTA•2H<sub>2</sub>O/L, pH 9.0).

Target Retrieval Solution, High pH, 10x: DakoCytomation # S3307 (12.1 g Tris Base/L, pH 9.9). (very often damage tissue)

30% H<sub>2</sub>O<sub>2</sub> (10x): Sigma # H1009-500ML.

Avidin/Biotin Blocking Kit: Vector Laboratories # SP-2001.

VECTASTAIN Elite ABC Kit (Standard): Vector Laboratories # PK-6100.

DAB Peroxidase Substrate: Sigma # D-4293.

Cytoseal 60 Mounting Medium: Richard-Allan Scientific # 8310-4.

PAP pen: The Binding Site, INC #AD100.1S.

### **Dual immunohistochemical staining**

Double staining using the indicated antibody combinations was performed using EnVisionR Doublestain System (DakoCytomation) following the manufacturer's instructions.

### **Enrichment analysis of gene lists in functional categories**

The lists of differentially expressed genes were analyzed for relative enrichment with certain categories from several functional ontologies in MetaCore, including GO and GeneGo cellular processes, metabolic pathways, diseases, or canonical pathways maps. The results were presented as histograms ranked by a  $-\log(\text{pValue})$ . The pValues were calculated using the same basic formula for a hypergeometric distribution where the p-Value essentially represents the probability of particular mapping arising by chance, given the numbers of genes in the set of all genes on maps/networks/processes, genes on a particular map/network/process and genes in your list.

### **Scoring and prioritization of ontology categories according to the relevance of input data**

In most cases, HT experimental datasets are very large and may include thousands of genes. In such cases, the issue of prioritizing pathway maps, networks and modules is important and can be based on different parameters, but follows the same procedure described below. The data set is divided into two random overlapping subsets in general where the size of the intersection between them represents a random variable with a hypergeometric distribution. We applied this for numerical scoring and prioritization of the node-centered networks. Let us consider a general data set size of  $N$  with  $R$  marked objects/events (for example, the nodes with expression data). The probability of a random sub-set size of  $n$  to include  $r$  marked events/objects is described by the distribution.

The mean of this distribution is equal to: 
$$\mu = \sum_{r=0}^n r \cdot P(r, n, R, N) = \frac{n \cdot R}{N} = n \cdot q,$$

Where  $q = R/N$  defines the ratio of marked objects.

The dispersion of this distribution is described as:

$$\sigma^2 = \sum_{r=0}^n r^2 \cdot P(r, n, R, N) - \mu^2 = \frac{n \cdot R \cdot (N - n) \cdot (N - R)}{N^2 \cdot (N - 1)} = n \cdot q \cdot (1 - q) \cdot \left(1 - \frac{n - 1}{N - 1}\right).$$

It is essential that these equations are invariant in terms of exchange of  $n$  for  $R$  which means that the "subset" and "marked" are equivalent and symmetrical sets. Importantly, in the cases of  $r > n$ ,  $r > R$  or  $r < R + n - N$ ,  $P(r, n, R, N) = 0$

### **P-value and evaluation of statistical significance of pathway maps, GO folders and disease biomarkers folders**

For a network of a certain size we can evaluate its statistical significance based on the probability of its assembly from a random set of nodes the same size as the input list. We can also evaluate the network's relevance to biological processes or any other subset of nodes. Let us consider a complete set of nodes in the network, divided into two overlapping subsets. These subsets represent the nodes linked to a certain pre-defined node list. In the general case, these subsets are different but overlapping and we assume that the intersection is large enough and non-random. We do not consider a situation where the intersection is small but non-random. The null-hypothesis states that the subsets are independent and, therefore, the size of the intersection satisfies a hypergeometric

distribution. The alternative hypothesis states that there is positive correlation between the subsets. Based on these assumptions, we can calculate a p-value as the probability of intersection of two random sub-sets from the same set.

$$pVal(r, n, R, N) = \frac{\sum_{i=\max(r, R+n-N)}^{\min(n, R)} P(i, n, R, N)}{N!} = \frac{R!n!(N-R)!(N-n)!}{N!} \frac{1}{\sum_{i=\max(r, R+n-N)}^{\min(n, R)} i!(R-i)!(n-i)!(N-R-n+i)!}$$

### **Evaluation of network topology**

*Degree of nodes:* The number of links (interactions) connected to a node (protein) gives the node's degree. Since our network is directed, the nodes are characterized by in and out-degree, giving the number of outgoing and incoming interactions. *Average shortest path* The shortest distance between two nodes is the number of links (interactions) along the shortest path(s). The average shortest path is the average over the shortest paths for all node pairs in the network. When we calculate the shortest paths for a subset of nodes (the set of proteins for colon and breast cancer) in the global network we also consider paths crossing through nodes which are not part of the subset.

*Average clustering coefficient.* The clustering coefficient captures to what degree node's neighbors are connected. It is defined as:  $C_i = \frac{2n_i}{k_i(k_i - 1)}$ , where  $n_i$  is the number of links among the  $k_i$  neighbors

of node  $i$ . As  $k_i(k_i-1)/2$  is the maximum number of such links, the clustering coefficient is a number between 0 and 1. The average clustering coefficient is obtained by averaging over the clustering coefficient of individual nodes. A network with high clustering coefficient is characterized by highly connected sub-graphs.

### **Evaluation of significance (p-value) for topological properties**

We extracted the protein-protein interactions from the signaling interaction content of Metacore. We calculated the topological properties (average degree, clustering coefficient and shortest paths) of the experimentally analyzed genes and compared them with the properties of the subset of interest (such as differentially expressed genes). In order to assign statistical significance to the differences observed we generated 10,000 times sets of randomly picked genes, of the same size as the size of the subset of interest, from the experimentally analyzed genes (as these were the genes which *can* become part of the subset of interest). For example, if we had a subset of 10 genes we would calculate the average degree of these 10 genes and generate 10,000 times sets of genes (of size 10) by randomly picking genes from the experimentally analyzed set and count how many times our set of interest gives larger degree than the randomly generated sets. If our set of interest has a larger average degree than 9,500 of the random sets (and respectively smaller average degree than 500 of the random sets) we assign a p-value of 0.05 (i.e. 500/10,000), that is, our set has significantly large average degree at p=0.05 significance level.

### **Evaluation of significantly over (under)-connected proteins**

We calculated the interactions of proteins within a set of interest (such as differentially expressed genes in cells and tissues) and compared that with the number of connection in the global protein "interactome". The goal of the analysis was to identify proteins with a significantly large number of interactions within the set of interest. We assigned statistical significance by using the cumulative

hypergeometric distribution as follows:  $p(k) = \sum_{i=k}^D P(i, D, n, N)$ , where



$$P(k, D, n, N) = \frac{\binom{D}{k} \binom{N-D}{n-k}}{\binom{N}{n}}.$$

N - the number of proteins (protein-based network objects) in our global “interactome” extracted from Metacore

n - number of proteins derived from the sets of genes of interest

D - the degree of a given protein in the global “interactome” database

k - the degree of a given protein within the set of interest

The p-value calculated above gives the probability of observing  $k$  or more interactions of a given protein (with degree  $D$  in global network) by random chance within the set of interest (of size  $n$ ). The probability of observing “under-connected” connected proteins can be calculated by  $1-p(k)$ . The input lists of genes were converted to protein-based network objects which have been used in our analysis. The resulting network objects sets were divided by a subsets based on the molecular function (receptors, ligands, etc.).

**Table S1. List of markers used.** Gene symbol, description, cell type-specific expression, and references are listed.

| Gene symbol                | Description                             | Cell type-specific expression pattern | Reference                                                                                     |
|----------------------------|-----------------------------------------|---------------------------------------|-----------------------------------------------------------------------------------------------|
| <i>CD24</i>                | CD24 antigen                            | Luminal epithelial cells              | Sleeman, K. E. et al. (2006). <i>Breast Cancer Res</i> 8, R7.                                 |
| <i>KRT18</i>               | Cytokeratin 18                          | Luminal epithelial cells              | Moll, R. (1998). <i>Subcell Biochem</i> 31, 205-262.                                          |
| <i>EPCAM</i>               | Epithelial Specific Antigen             | Epithelial cells                      | Gudjonsson, T. et al. (2002). <i>Genes Dev</i> 16, 693-706.                                   |
| <i>MUC1</i>                | mucin 1                                 | Luminal epithelial cells              | Stingl, J. et al. (2005). <i>J Mammary Gland Biol Neoplasia</i> 10, 49-59.                    |
| <i>CDH1</i>                | E-cadherin                              | Luminal epithelial cells              | Palacios, J. et al. (1995). <i>Am J Pathol</i> 146, 605-612.                                  |
| <i>CD44</i>                | CD44 antigen                            | Mammary epithelial progenitors        | Dontu, G. et al. (2005). <i>Stem Cell Rev</i> 1, 207-213.                                     |
| <i>KRT19</i>               | Cytokeratin 19                          | Mammary epithelial progenitors        | Petersen, O. W. et al. (2003). <i>Cell Prolif</i> 36 Suppl 1, 33-44.                          |
| <i>ITGA6</i>               | integrin $\alpha 6$                     | Mammary epithelial progenitors        | Stingl, J. et al. (2005). <i>J Mammary Gland Biol Neoplasia</i> 10, 49-59.                    |
| <i>VIM</i>                 | vimentin                                | Basal/myoepithelial cells             | Azumi, N., and Battifora, H. (1987). <i>Am J Clin Pathol</i> 88, 286-296.                     |
| <i>TP63</i>                | p63                                     | Basal/myoepithelial cells             | Barbareschi, M. et al. (2001). <i>Am J Surg Pathol</i> 25, 1054-1060.                         |
| <i>KRT5</i>                | Cytokeratin 5                           | Basal/myoepithelial cells             | Moll, R. et al. (1982). <i>Cell</i> 31, 11-24.                                                |
| <i>KRT14</i>               | Cytokeratin 14                          | Basal/myoepithelial cells             | Takai, Y. et al. (1995). <i>Oral Surg Oral Med Oral Pathol Oral Radiol Endod</i> 79, 330-341. |
| <i>KRT17</i>               | Cytokeratin 17                          | Basal/myoepithelial cells             | Troyanovsky, S. M. et al. (1989). <i>J Cell Sci</i> 93 ( Pt 3), 419-426.                      |
| <i>ACTA2</i>               | $\alpha$ -smooth muscle actin           | Myoepithelial cells                   | Savera, A. T. et al. (1997). <i>Mod Pathol</i> 10, 1093-1100.                                 |
| <i>MME</i>                 | CD10                                    | Basal/myoepithelial cells             | Moritani, S. et al. (2002). <i>Mod Pathol</i> 15, 397-405.                                    |
| <i>ITGB6</i>               | integrin $\beta 6$                      | Basal/myoepithelial cells             | this current study                                                                            |
| <i>LAMA3, LAMB3, LAMC2</i> | Laminin 5 ( $\alpha 3\beta 3\gamma 2$ ) | Basement membrane protein             | Zapatka, M. et al. (2007). <i>Oncogene</i> 26, 1417-1427.                                     |
| <i>MKI67</i>               | Ki67                                    | Marker of proliferating cells         | Vielh, P. et al. (1990). <i>Am J Clin Pathol</i> 94, 681-686.                                 |

**Table S2. List of antibodies used.** Antigen, antibody clone name, source, catalogue number (cat#), species, application, and antigen retrieval method (AR, see above detailed Immunohistochemistry protocol) are listed. Abbreviations: FACS-Fluorescence-activated cell sorting, IB-Immunoblot, ICC-Immunocytochemistry, IF-Immunofluorescence, IHC-Immunohistochemistry, iFISH-Immunofluorescence combined with fluorescence in situ hybridization (FISH). Secondary antibodies were purchased from PIERCE (Rockford, IL) or Jackson ImmunoResearch Laboratories (West Grove, PA).

| Antigen                | Clone name     | Source                                                     | Cat #       | Species | Application             | AR |
|------------------------|----------------|------------------------------------------------------------|-------------|---------|-------------------------|----|
| β-actin                | AC-74          | Sigma                                                      | A2228       | mouse   | IB                      |    |
| CD10                   | 56C6           | Ventana Medical Systems, Inc                               | 790-2923    | mouse   | IHC                     |    |
| CD10-RPE               | SS2/36         | DAKO                                                       | R0848       | mouse   | FACS                    |    |
| CD24                   | ML5            | BD Biosciences                                             | 555426      | mouse   | IHC                     | a  |
| CD24-FITC              | ML5            | BD Biosciences                                             | 555427      | mouse   | FACS                    |    |
| CD44                   | 515            | BD Biosciences                                             | 550988      | mouse   | IHC                     | a  |
| CD44                   | 156-3C11       | NeoMarkers                                                 | MS-668-P1   | mouse   | IHC                     | b  |
| CD44-PE                | G44-26         | BD Biosciences                                             | 555479      | mouse   | FACS                    |    |
| CD49f-PE (integrin α6) | GoH3           | BD Biosciences                                             | 555736      | rat     | FACS                    |    |
| Cox2                   | CX229          | Cayman Chemical                                            | 160112      | mouse   | IHC                     | b  |
| Cytokeratin 14         | LL002          | Novocastra Laboratories                                    | NCL-L-LL002 | mouse   | IHC, ICC, IB            | a  |
| Cytokeratin 17         | E3             | DAKO                                                       | M7046       | mouse   | IHC                     | b  |
| Cytokeratin 18         | C51            | Novocastra Laboratories                                    | NCL-C51     | mouse   | IHC                     | b  |
| Cytokeratin 19         | RCK108         | DAKO                                                       | M0888       | mouse   | IHC                     | b  |
| Cytokeratin 5/6        | D5/16 B4       | DAKO                                                       | M7237       | mouse   | IHC                     | b  |
| E-Cadherin (CDH1)      | 36             | BD Biosciences                                             | 610181      | mouse   | IHC                     | b  |
| ESA                    | B302 (323/A3)  | Biomeda                                                    | V7018       | mouse   | IHC                     | d  |
| ESA-FITC               | B29.1 (VU-ID9) | Biomeda                                                    | FM010       | mouse   | FACS                    |    |
| Gli2                   | H-300          | Santa Cruz Biotechnology                                   | sc-28674    | rabbit  | IB                      |    |
| Integrin β6            | 6.2A1          | Dr. Shelia Violette (Biogen Idec, Inc., Cambridge, MA)     |             | mouse   | IHC, IB                 | d  |
| Integrin β6            | 6.3G9          | Dr. Shelia Violette (Biogen Idec, Inc., Cambridge, MA)     |             | mouse   | FACS, purification      |    |
| Integrin β6            | ch2A1          | Dr. Shelia Violette (Biogen Idec, Inc., Cambridge, MA)     |             | human   | IHC                     | d  |
| Ki-67 antigen          | MIB1           | DAKO                                                       | M7240       | mouse   | IHC                     | a  |
| Ki-67 antigen          |                | Vector Laboratories                                        | VP-K451     | rabbit  | IHC                     | a  |
| Laminin 5              | 9LN5           | Dr. William Brunken (Tufts University, Boston, MA)         |             | rabbit  | IHC, IB                 | b  |
| MMP14                  |                | Chemicon                                                   | AB815       | rabbit  | IB                      |    |
| Muc1                   | CT2            | Dr. Donald Kufe (Dana Farber Cancer Institute, Boston, MA) |             | hamster | IB                      |    |
| Muc1                   | DF3            | Dr. Donald Kufe (Dana Farber Cancer Institute, Boston, MA) |             | mouse   | IHC, FACS, purification | a  |
| p63                    | 4A4            | Calbiochem                                                 | OP132       | mouse   | IHC, IB                 | a  |
| p63                    | 4A4            | Chemicon                                                   | MAB4135     | mouse   | IHC, IB                 | c  |
| Pan Cytokeratin        | AE1/AE3        | DAKO                                                       | M3515       | mouse   | IHC, iFISH              | a  |
| SMAD4                  |                | Cell Signaling                                             | 9515        | rabbit  | IB                      |    |
| Smooth muscle actin    | 1A4            | DAKO                                                       | M0851       | mouse   | IHC, iFISH              | b  |
| TGFβ Receptor II       |                | Cell Signaling                                             | 2518        | rabbit  | IB                      |    |
| Vimentin               | V9             | DAKO                                                       | M0725       | mouse   | IHC, IB                 | b  |

**Table S3. List of genes differentially expressed between ITGB6+ and MUC1+ cells from MCFDCIS xenografts and from myoepithelial and epithelial cells in human breast tissue. Gene symbols, protein names, functional categories, ratios in expression, and p values of the observed differences are listed.**

| #  | Gene Symbol      | Protein            | Class                                                                               | Protein name                                           | ITGB6+/MUC1+ |         | Myoepi/Epi |         |
|----|------------------|--------------------|-------------------------------------------------------------------------------------|--------------------------------------------------------|--------------|---------|------------|---------|
|    |                  |                    |                                                                                     |                                                        | Signal       | P_value | Signal     | P_value |
| 1  | <u>APOE</u>      | <u>APOE_HUMAN</u>  |    | Apolipoprotein E precursor                             | 9.088        | 0       | 6.052      | 0.001   |
| 2  | <u>AXL</u>       | <u>UFO_HUMAN</u>   |    | Tyrosine-protein kinase receptor UFO precursor         | 8.179        | 0.006   | 15.65      | 0       |
| 3  | <u>AZGP1</u>     | <u>ZA2G_HUMAN</u>  |    | Zinc-alpha-2-glycoprotein precursor                    | -41.81       | 0       | -9.025     | 0.01    |
| 4  | <u>CDKN1A</u>    | <u>CDN1A_HUMA</u>  |    | Cyclin-dependent kinase inhibitor 1                    | 4.09         | 0.01    | 2.465      | 0.002   |
| 5  | <u>CFL1</u>      | <u>COF1_HUMAN</u>  |    | Cofilin-1                                              | 3.635        | 0.009   | -6.574     | 0.025   |
| 6  | <u>COL4A2</u>    | <u>CO4A2_HUMA</u>  |    | Collagen alpha-2(IV) chain precursor [Contains:        | 13.63        | 0.002   | 14.77      | 0       |
| 7  | <u>COL7A1</u>    | <u>CO7A1_HUMA</u>  |    | Collagen alpha-1(VII) chain precursor                  | 13.63        | 0.002   | 4.082      | 0.009   |
| 8  | <u>CTNNBIP1</u>  | <u>CNBP1_HUMA</u>  |    | Beta-catenin-interacting protein 1                     | 9.088        | 0.015   | -3.107     | 0.018   |
| 9  | <u>DUSP6</u>     | <u>DUS6_HUMAN</u>  |    | Dual specificity protein phosphatase 6                 | 3.938        | 0.034   | 4.283      | 0.009   |
| 10 | <u>EFCAB4A</u>   | <u>EFC4A_HUMA</u>  |    | EF-hand calcium-binding domain-containing protein 4A   | -6.602       | 0.001   | -7.269     | 0.005   |
| 11 | <u>FXJD3</u>     | <u>FXJD3_HUMA</u>  |    | FXJD domain-containing ion transport regulator 3       | -2.106       | 0.001   | -4.718     | 0.002   |
| 12 | <u>GABRP</u>     | <u>GBRP_HUMAN</u>  |    | Gamma-aminobutyric-acid receptor subunit pi precursor  | -2.32        | 0       | -15.24     | 0.018   |
| 13 | <u>GPC1</u>      | <u>GPC1_HUMAN</u>  |    | Glypican-1 precursor                                   | 9.088        | 0.003   | 7.143      | 0.028   |
| 14 | <u>HAX1</u>      | <u>HAX1_HUMAN</u>  |    | HS1-associating protein X-1                            | 3.272        | 0.021   | -2.9       | 0.005   |
| 15 | <u>JMJD3</u>     | <u>JMJD3</u>       |    | jumonji domain containing 3                            | 2.726        | 0.027   | 1.96       | 0.032   |
| 16 | <u>LGALS1</u>    | <u>LEG1_HUMAN</u>  |    | Galectin-1                                             | 1.912        | 0       | 4.804      | 0.008   |
| 17 | <u>LOC124220</u> | <u>U773_HUMAN</u>  |    | Protein UNQ773/PRO1567 precursor                       | -45.11       | 0       | -9.574     | 0.003   |
| 18 | <u>MAL2</u>      | <u>MAL2_HUMAN</u>  |    | Protein MAL2                                           | -15.41       | 0       | -4.566     | 0.002   |
| 19 | <u>MRC2</u>      | <u>MRC2_HUMAN</u>  |    | Macrophage mannose receptor 2 precursor                | 4.544        | 0       | 11.14      | 0.001   |
| 20 | <u>MST150</u>    | <u>NID67_HUMAN</u> |   | Putative small membrane protein NID67                  | 9.997        | 0.002   | 13.43      | 0.034   |
| 21 | <u>MT2A</u>      | <u>MT2_HUMAN</u>   |  | Metallothionein-2                                      | 20.3         | 0       | 6.83       | 0       |
| 22 | <u>MYL9</u>      | <u>MLRN_HUMAN</u>  |  | Myosin regulatory light chain 2, smooth muscle isoform | 9.088        | 0.003   | 4.507      | 0       |
| 23 | <u>NNMT</u>      | <u>NNMT_HUMAN</u>  |  | Nicotinamide N-methyltransferase                       | 8.179        | 0.028   | 10.28      | 0       |
| 24 | <u>S100A14</u>   | <u>S10AE_HUMA</u>  |  | Protein S100-A14                                       | 1.601        | 0.049   | -3.884     | 0.006   |
| 25 | <u>SCGB1D2</u>   | <u>SG1D2_HUMA</u>  |  | Secretoglobulin family 1D member 2 precursor           | -4.035       | 0.003   | -7.051     | 0.025   |
| 26 | <u>SERPINA1</u>  | <u>A1AT_HUMAN</u>  |  | Alpha-1-antitrypsin precursor                          | 4.771        | 0       | -13.28     | 0.012   |
| 27 | <u>SERPINA3</u>  | <u>AACT_HUMAN</u>  |  | Alpha-1-antichymotrypsin precursor                     | -1.695       | 0.013   | -5.83      | 0.004   |
| 28 |                  | <u>SPH2_HUMAN</u>  |  | Collagen-binding protein 2 precursor                   | 7.27         | 0.008   | 4.667      | 0.001   |
|    | <u>SERPINH1</u>  | <u>SERPH_HUMA</u>  |  | Serpin H1 precursor                                    |              |         |            |         |
| 29 | <u>SPARC</u>     | <u>SPRC_HUMAN</u>  |  | SPARC precursor                                        | 42.71        | 0       | 15.11      | 0.001   |
| 30 | <u>SPDEF</u>     | <u>SPDEF_HUMA</u>  |  | SAM pointed domain-containing Ets transcription factor | -3.081       | 0.05    | -37.8      | 0.003   |
| 31 | <u>SREBF1</u>    | <u>SRBP1_HUMA</u>  |  | Sterol regulatory element-binding protein 1            | -2.455       | 0.021   | -3.673     | 0.01    |
| 32 | <u>STAP2</u>     | <u>STAP2_HUMA</u>  |  | Signal-transducing adaptor protein 2                   | -3.081       | 0.05    | -5.124     | 0.005   |
| 33 | <u>SYNGR2</u>    | <u>SNG2_HUMAN</u>  |  | Synaptogyrin-2                                         | -3.026       | 0.014   | -5.377     | 0.002   |
| 34 | <u>TAGLN</u>     | <u>TAGL_HUMAN</u>  |  | Transgelin                                             | 16.36        | 0.001   | 16.8       | 0       |
| 35 | <u>TIMP1</u>     | <u>TIMP1_HUMAN</u> |  | Metalloproteinase inhibitor 1 precursor                | 6.059        | 0       | 3.006      | 0.037   |
| 36 | <u>TM9SF2</u>    | <u>TM9S2_HUMA</u>  |  | Transmembrane 9 superfamily protein member 2           | -7.702       | 0.042   | -3.704     | 0.002   |
| 37 | <u>TPM2</u>      | <u>TPM2_HUMAN</u>  |  | Tropomyosin beta chain                                 | 16.36        | 0.001   | 7.576      | 0.001   |
| 38 | <u>TRIM26</u>    | <u>TRI26_HUMAN</u> |  | Tripartite motif-containing protein 26                 | -7.702       | 0.042   | -1.996     | 0.041   |
| 39 | <u>UCK2</u>      | <u>UCK2_HUMAN</u>  |  | Uridine-cytidine kinase 2                              | -4.035       | 0.042   | 3.681      | 0.03    |
| 40 | <u>VIM</u>       | <u>VIME_HUMAN</u>  |  | Vimentin                                               | 2.908        | 0       | 7.695      | 0       |

**Table S4. List of top scoring pathway maps, GO processes, and biomarkers differentially represented between ITGB6+ and MUC1+ cells from MCFDCIS xenografts and from myoepithelial and epithelial cells in human breast tissue.**

| Myoepithelial/epithelial cells                                                      |          | ITGB6+/MUC1+ cells                                                                         |          |
|-------------------------------------------------------------------------------------|----------|--------------------------------------------------------------------------------------------|----------|
| Map                                                                                 | p-Value  | Map                                                                                        | p-Value  |
| Oxidative phosphorylation                                                           | 1.43E-06 | * Cell adhesion_ECM remodeling                                                             | 2.92E-04 |
| * Cell adhesion_ECM remodeling                                                      | 4.40E-05 | Cytoskeleton remodeling_Regulation of actin cytoskeleton by Rho GTPases                    | 3.22E-04 |
| * Cell adhesion_Integrin-mediated cell adhesion                                     | 1.48E-04 | * Cytoskeleton remodeling_Slit-Robo signaling                                              | 2.19E-03 |
| * Cytoskeleton remodeling_Keratin filaments                                         | 6.32E-04 | * Cytoskeleton remodeling_Cytoskeleton remodeling                                          | 4.02E-03 |
| * Cell adhesion_Role of tetraspanins in the integrin-mediated cell adhesion         | 8.51E-04 | * Niacin-HDL metabolism                                                                    | 5.37E-03 |
| * Cell adhesion_Endothelial cell contacts by non-junctional mechanisms              | 3.28E-03 | * Development_MAG-dependent inhibition of neurite outgrowth                                | 7.45E-03 |
| * Cytoskeleton remodeling_Cytoskeleton remodeling                                   | 3.89E-03 | Transcription_Role of Akt in hypoxia induced HIF1 activation                               | 1.00E-02 |
| * Cell adhesion_Chemokines and adhesion                                             | 4.04E-03 | * Cell adhesion_Chemokines and adhesion                                                    | 1.25E-02 |
| * Cytoskeleton remodeling_Fibronectin-binding integrins in cell motility            | 9.51E-03 | * Cell adhesion_Role of tetraspanins in the integrin-mediated cell adhesion                | 2.36E-02 |
| * Niacin-HDL metabolism                                                             | 9.67E-03 | Oxidative stress_Role ASK1 under oxidative stress                                          | 2.53E-02 |
| * Cytoskeleton remodeling_Slit-Robo signaling                                       | 1.21E-02 | * Regulation of lipid metabolism_Regulation of lipid metabolism by niacin and isoprenaline | 2.66E-02 |
| * Cytoskeleton remodeling_Alpha-1A adrenergic receptor-dependent inhibition of PI3K | 1.58E-02 | * Cytoskeleton remodeling_TGF, WNT and cytoskeletal remodeling                             | 2.87E-02 |
| * Cytoskeleton remodeling_Neurofilaments                                            | 1.82E-02 | * Glycolysis and gluconeogenesis p. 2 / Human version                                      | 3.20E-02 |
| Cytoskeleton remodeling_Regulation of actin cytoskeleton by Rho GTPases             | 2.92E-02 | * Immune response_CCR3 signaling in eosinophils                                            | 3.49E-02 |
| * Cytoskeleton remodeling_TGF, WNT and cytoskeletal remodeling                      | 2.97E-02 | * Cell adhesion_Integrin-mediated cell adhesion                                            | 3.72E-02 |
| Process                                                                             | p-Value  | Process                                                                                    | p-Value  |
| cell adhesion                                                                       | 3.22E-10 | regulation of actin polymerization and/or depolymerization                                 | 3.65E-09 |
| biological adhesion                                                                 | 3.22E-10 | regulation of actin filament length                                                        | 7.50E-09 |
| cellular component assembly                                                         | 1.38E-08 | glycolipid transport                                                                       | 3.03E-08 |
| actin cytoskeleton organization and biogenesis                                      | 8.21E-08 | negative regulation of biological process                                                  | 1.55E-07 |
| negative regulation of cellular process                                             | 1.24E-07 | actin polymerization and/or depolymerization                                               | 2.08E-07 |
| negative regulation of biological process                                           | 1.58E-07 | negative regulation of protein metabolic process                                           | 1.58E-06 |
| cell development                                                                    | 4.62E-07 | negative regulation of cellular process                                                    | 2.16E-06 |
| actin filament-based process                                                        | 4.64E-07 | multicellular organismal development                                                       | 5.76E-06 |
| negative regulation of cell adhesion                                                | 5.59E-07 | lipid transport                                                                            | 9.07E-06 |
| myoblast differentiation                                                            | 6.19E-07 | regulation of cellular component organization and biogenesis                               | 9.22E-06 |
| positive regulation of cell migration                                               | 9.46E-07 | regulation of actin filament polymerization                                                | 1.29E-05 |
| regulation of cell adhesion                                                         | 1.10E-06 | response to extracellular stimulus                                                         | 2.58E-05 |
| cell differentiation                                                                | 1.33E-06 | regulation of multicellular organismal process                                             | 3.09E-05 |
| cellular developmental process                                                      | 1.33E-06 | steroid catabolic process                                                                  | 3.48E-05 |
| negative regulation of cell proliferation                                           | 1.53E-06 | regulation of apoptosis                                                                    | 4.21E-05 |
| muscle fiber development                                                            | 4.12E-06 | sequestering of actin monomers                                                             | 4.25E-05 |
| Disease / disease group                                                             | p-Value  | Disease / disease group                                                                    | p-Value  |
| Urogenital neoplasms                                                                | 2.75E-09 | Carcinoma                                                                                  | 9.70E-13 |
| Breast neoplasms                                                                    | 6.65E-09 | Neoplasms, Glandular and Epithelial                                                        | 2.40E-11 |
| Breast diseases                                                                     | 6.90E-09 | Digestive System Neoplasms                                                                 | 6.60E-11 |
| CarcinomaUrological and male genital diseases                                       | 9.70E-09 | Endocrine System Diseases                                                                  | 2.30E-10 |
| Neoplasms, Grandular and Epithelial                                                 | 9.90E-09 | Adenocarcinoma                                                                             | 2.00E-09 |
| Urogenital diseases                                                                 | 1.40E-08 | Urogenital Diseases                                                                        | 2.20E-09 |
| Prostatic neoplasms                                                                 | 1.60E-08 | Flaviviridae Infections                                                                    | 3.60E-09 |
| Genital neoplasms, female                                                           | 2.70E-08 | Endocrine Gland Neoplasms                                                                  | 4.50E-09 |
| Neoplasms by site                                                                   | 3.20E-08 | Urogenital Neoplasms                                                                       | 6.50E-09 |
| Genital neoplasms, male                                                             | 4.90E-08 | Genital Neoplasms, Female                                                                  | 6.60E-09 |
| Wounds and injuries                                                                 | 5.20E-08 | Breast Neoplasms                                                                           | 7.90E-09 |
| Endocrine Gland Neoplasms                                                           | 6.90E-08 | Breast Diseases                                                                            | 1.20E-08 |
| Neoplasms                                                                           | 2.60E-07 | Neoplasms by Histologic Type                                                               | 1.40E-08 |

**Figure S1. Comparison of subcutaneous and mammary fat pad injections. A-B:** Histology of the tumors (H&E) and the expression of SMA and p63 analyzed at the indicated time points after injection to the mammary fat pad (**A**) and subcutaneous site (**B**). Although overall progression to invasion appears to be similar at the two sites, much higher fraction of the epithelial cells are positive for p63 in xenograft developed in the mammary fat pad indicating site-dependent differences in the differentiation of the cells. **C:** Histological and immunohistochemical analyses of the indicated xenografts derived from cell lines injected alone (-) or co-injected with normal myoepithelial cells (+HME). No DCIS histology and myoepithelial cell layer was detected in any of these tumors. SMA (smooth muscle actin) positive cells are mouse myofibroblasts and endothelial cells. Scale bars correspond to 100  $\mu\text{m}$ .

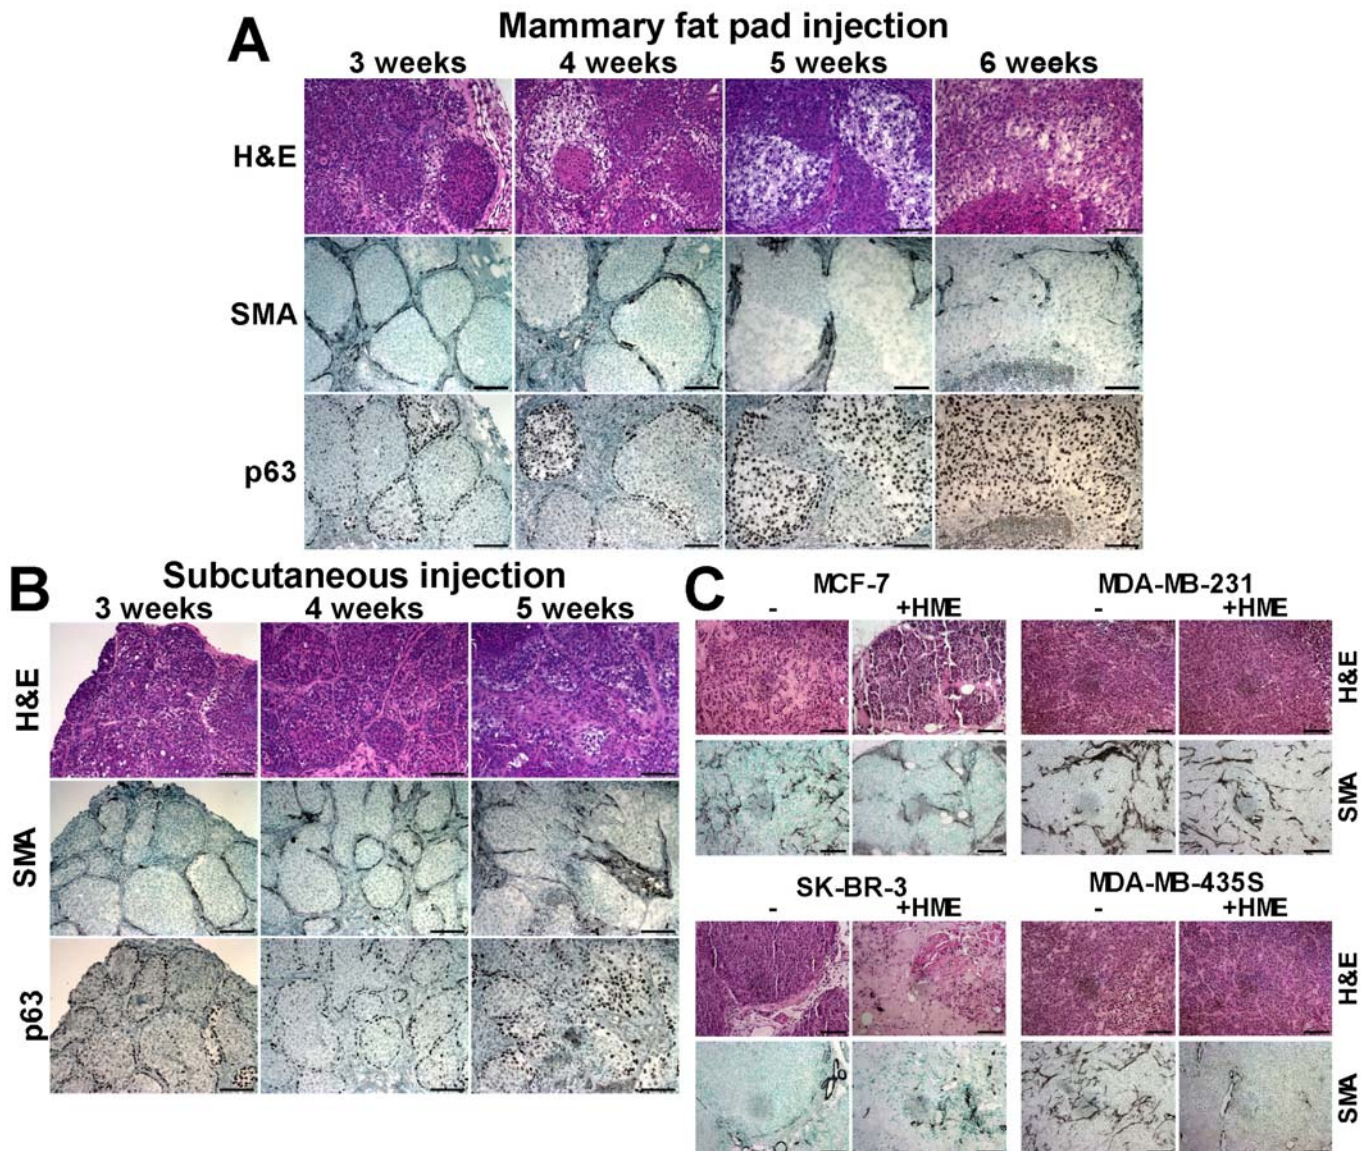

**Figure S2. Characterization of the progenitor properties of MCFDCIS cells.** Scale bars correspond to 100  $\mu\text{m}$  in all panels. **A:** Confirming the human origin of cytokeratin positive cells in MCFDCIS xenografts. Immuno-FISH analysis of the time course experiment demonstrates that cytokeratin (CTK) positive cells (blue cytoplasm) are of human origin. **B:** FACS analysis of cultured cells for the indicated cell surface markers. With the exception of MUC1 the cells are homogenously positive (ITGA6, ESA, ITGB6, and CD44) or negative (CD10 and CD24) for the proteins analyzed. The expression of ITGB6 is further increased following TGF $\beta$ 1 treatment. **C:** FACS sorting for MUC1+ and MUC1- cells and histology of xenografts resulting from them. Immunocytochemical (**D**) and immunoblot (**E**) analysis of CK14 and MUC1 expression in single-cell clones. **F:** Immunohistochemical analyses of the indicated markers in xenografts derived from single-cell clones. All clones gave rise to DCIS-like tumors, but clone 7 had a more invasive component. *In vivo*, the expression pattern of all proteins is the same in all clones regardless of their expression *in vitro*.

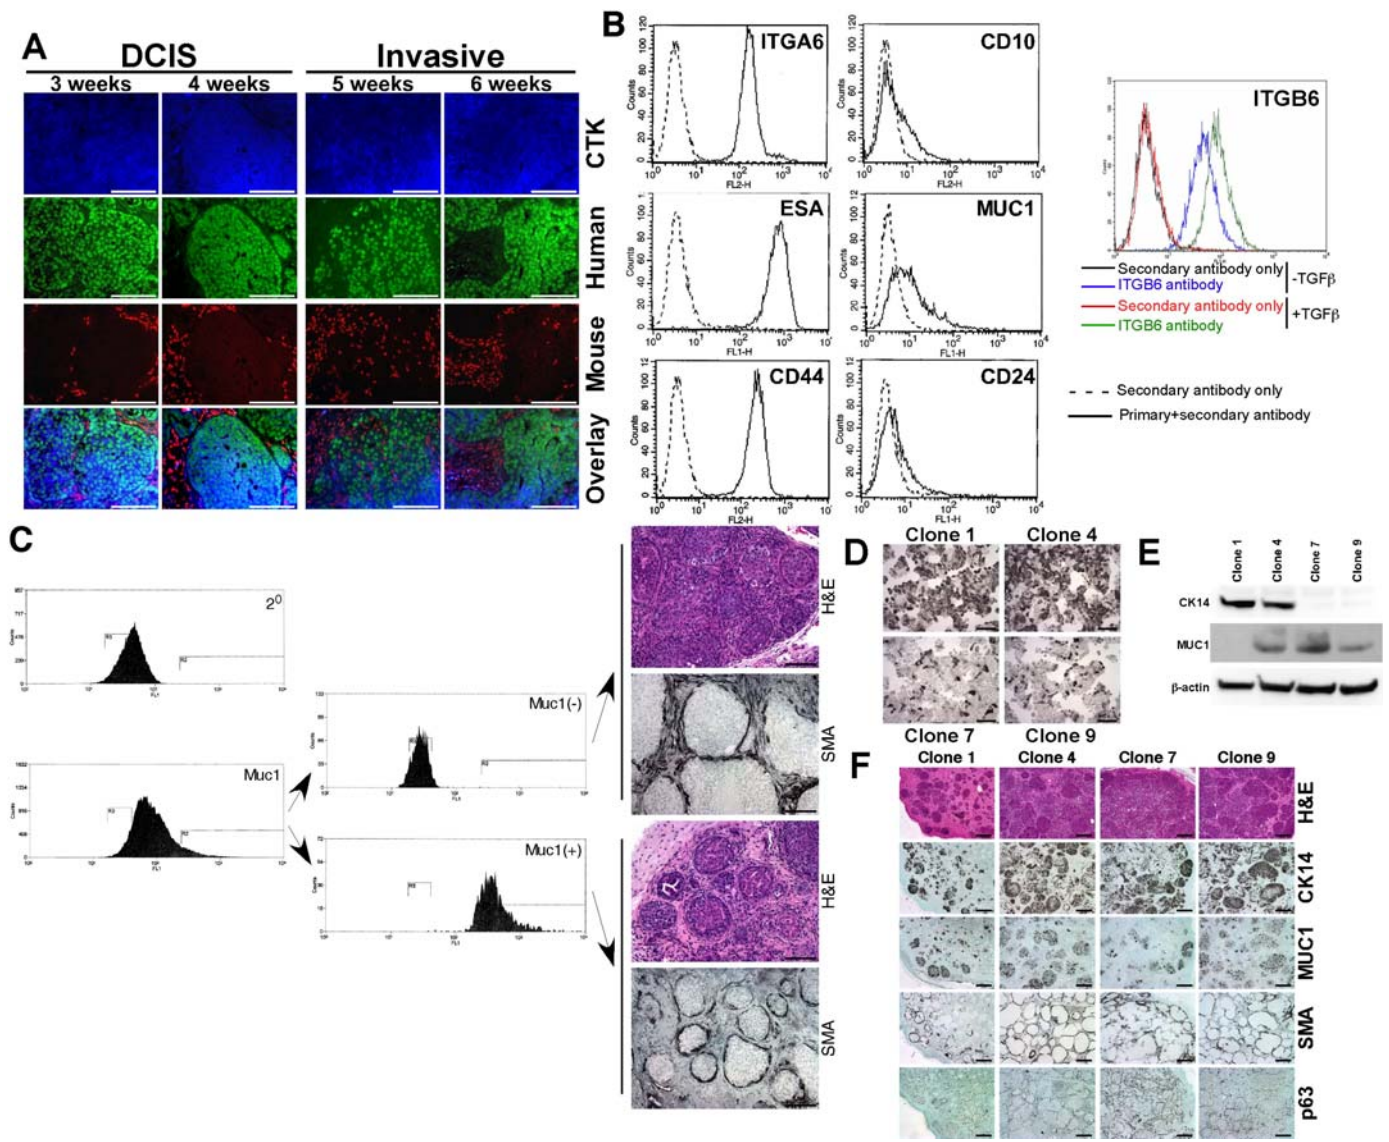

**Figure S3. Analysis of genetic changes in MCF10A series cells and MCFDCIS derived xenografts.** **A:** 11K SNP array analysis of the indicated cells and xenografts for copy number changes. Copy number gain of 8q24, including *MYC*, and homozygous deletion of *CDKN2A* at 9p21 are indicated. **B:** FISH confirmation of 8q24 copy number gain and insertion to 10q22. Upper panel: *MYC* probe (red) gave three hybridization signals, two on chromosome 8 (green) and one on chromosome 10 (aqua). Lower panel: *MYC* break apart probe (5' red and 3' green) shows two intact copies (yellow fused signal including both 5' and 3' portions) on chromosome 8 (aqua) while the signal on chromosome 10 contains only the 5' portion of the probe (red). **C:** 11K SNP array analysis of the indicated cells and xenografts. An inferred LOH (loss of heterozygosity) map including all chromosomes indicates that, with the exception of two tumors, none of the samples demonstrated copy number changes compared to MCFDCIS cells. Blue and yellow colors indicate LOH and retention of both alleles, respectively. **D:** 250K SNP array analysis of purified ITGB6+ and MUC1+ cells and their comparison to parental MCFDCIS cells. **E:** Enlarged view of chromosome 8 highlighting the focal copy number gain at 8q24.

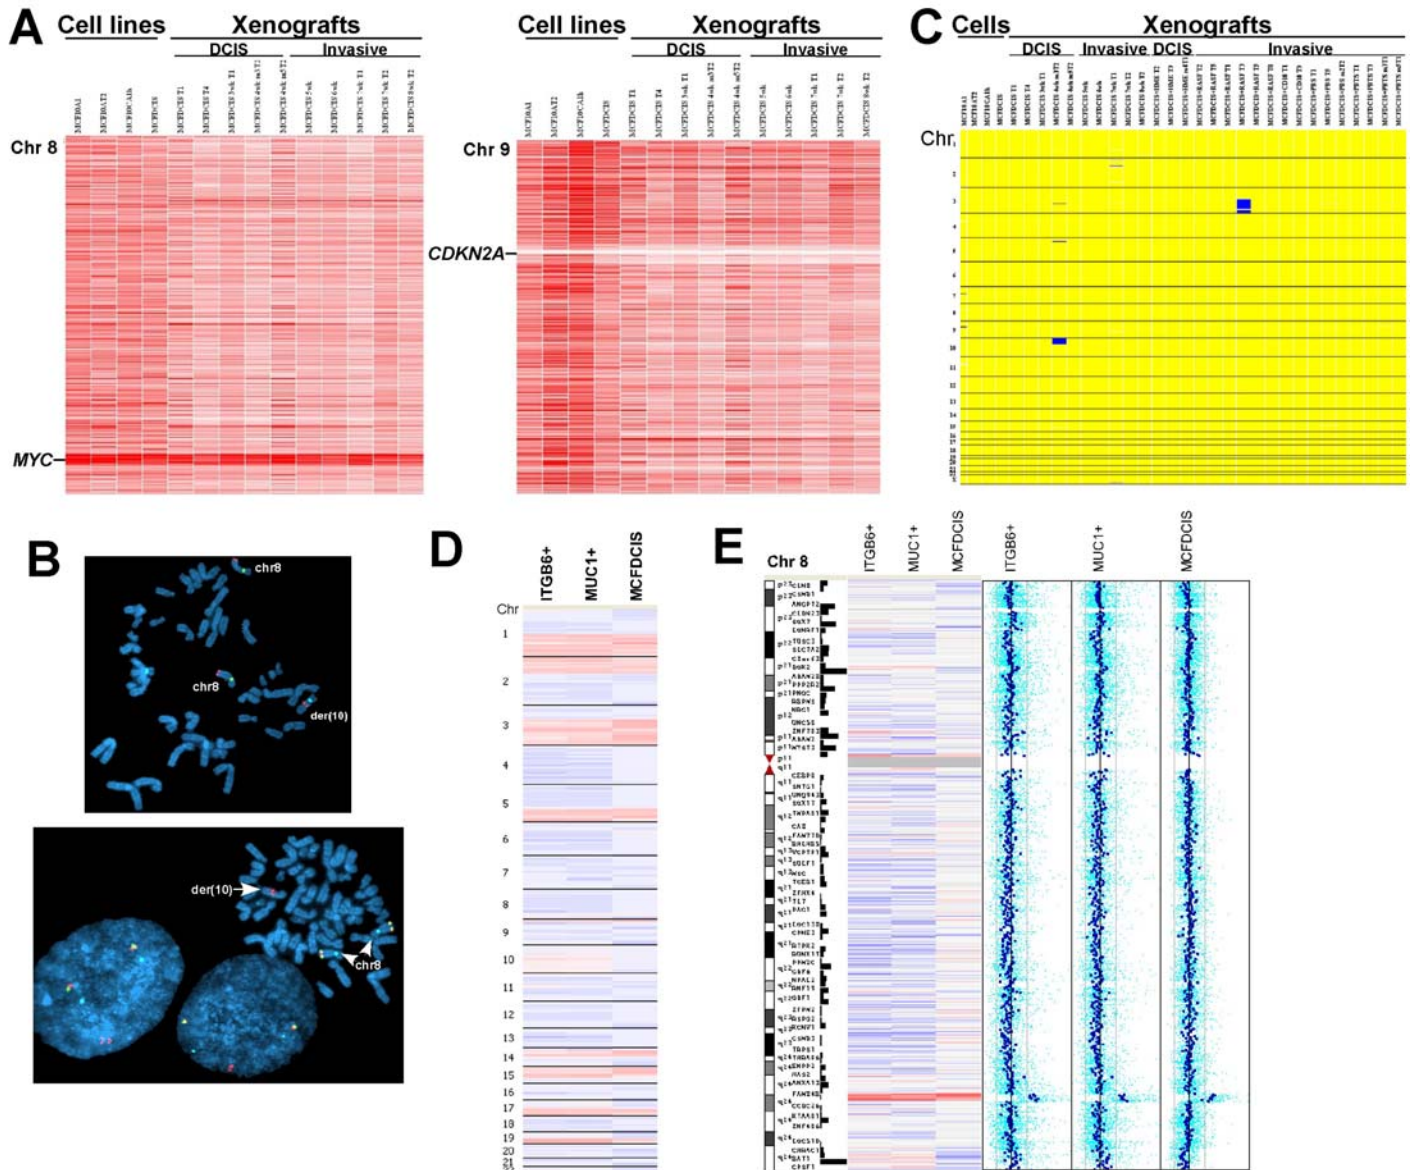



**Figure S4. Schematic model of basal-like DCIS.** The majority of histologic sections in DCIS represent normal ducts and lobules into which the tumor cells spread and only at the site of tumor initiation we may detect genetically abnormal bipotential tumor initiating cells. A prediction of this model is that some DCIS may already be invasive and spread outside of the ducts at a very early stage. This hypothesis is supported by recent data in a mouse model of DCIS describing systemic spread at early steps of tumorigenesis (Husemann et al., 2008).

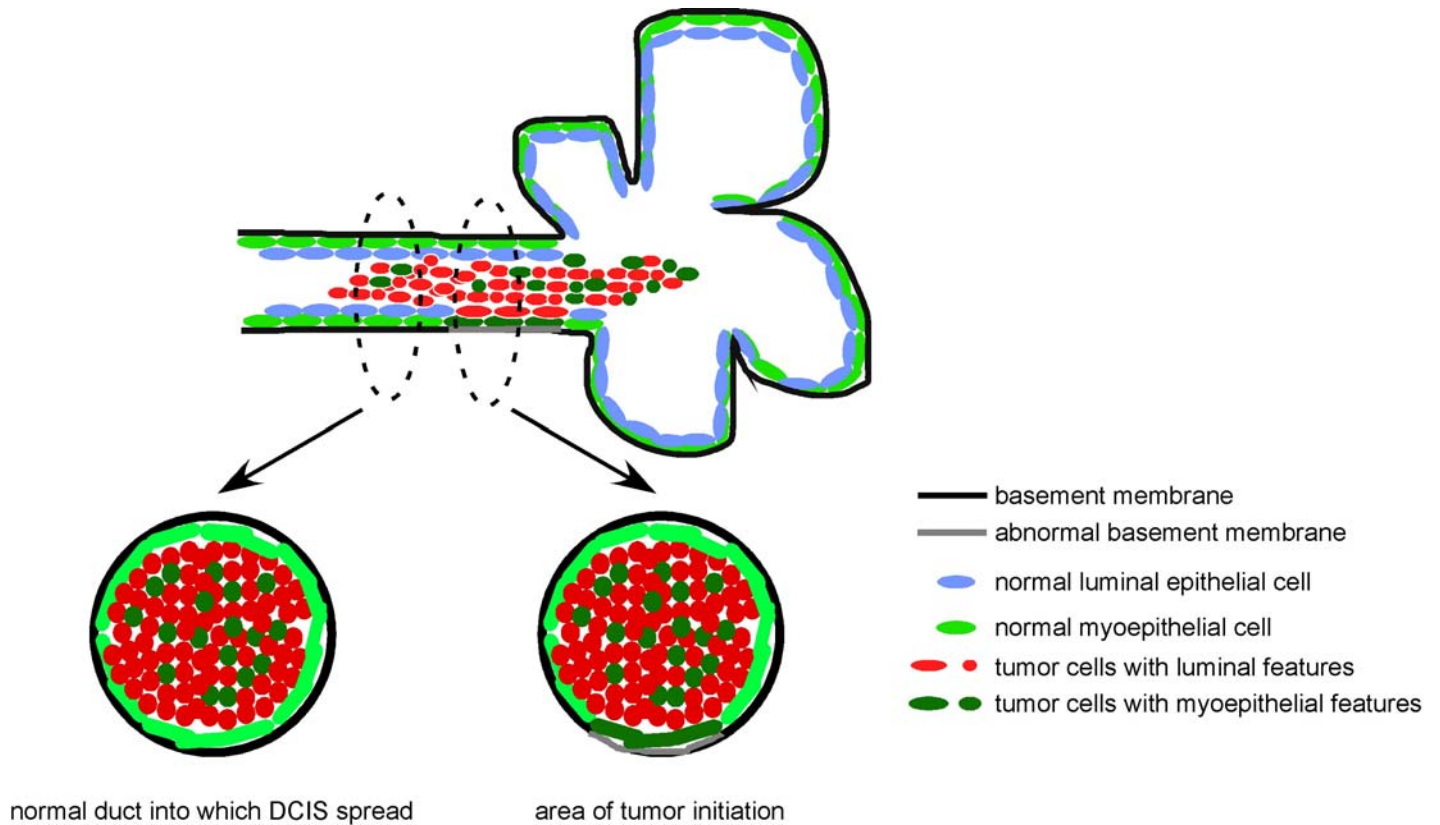

**Figure S5. Maps of signaling pathways differentially activated between epithelial and myoepithelial cells both in primary human breast tissue and in the MCFDCIS xenograft model. A: WNT, TGF $\beta$ , and cytoskeletal remodeling. B: Lipid metabolism. Red rectangles mark differentially expressed genes.**

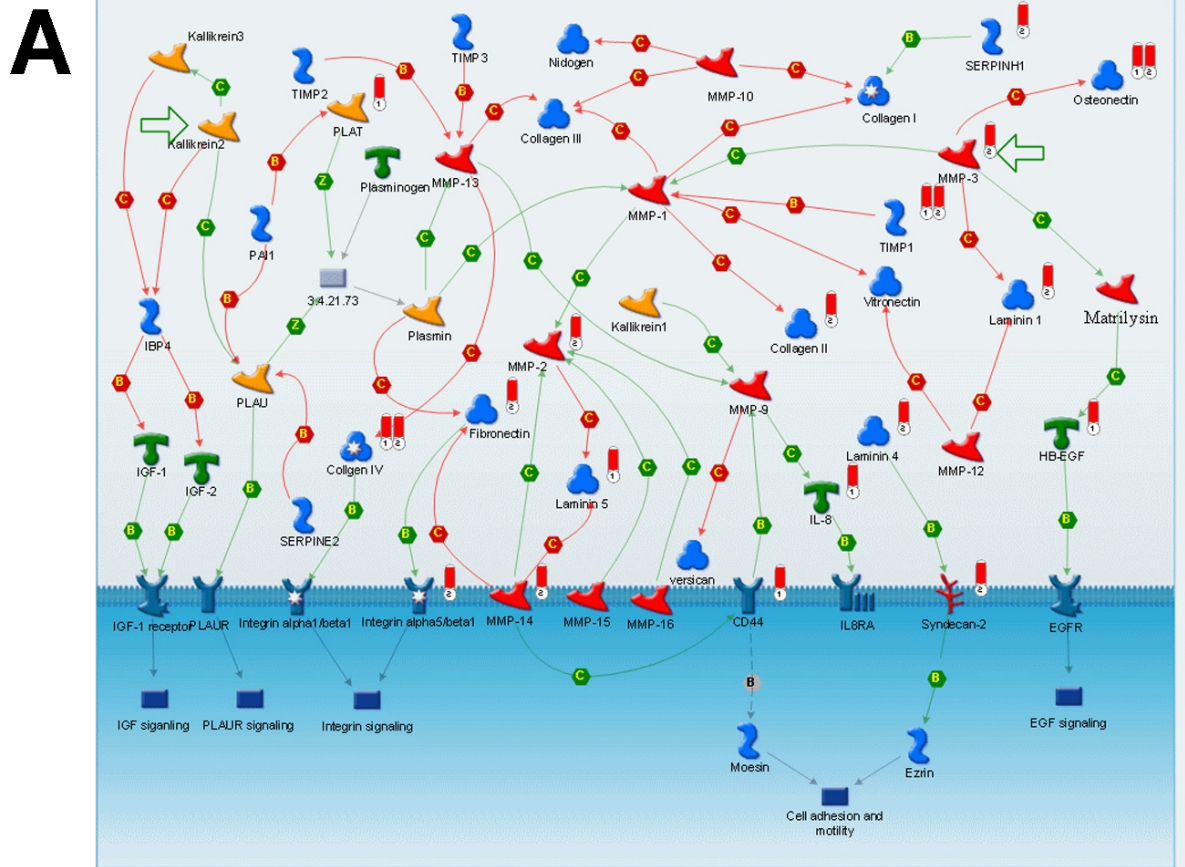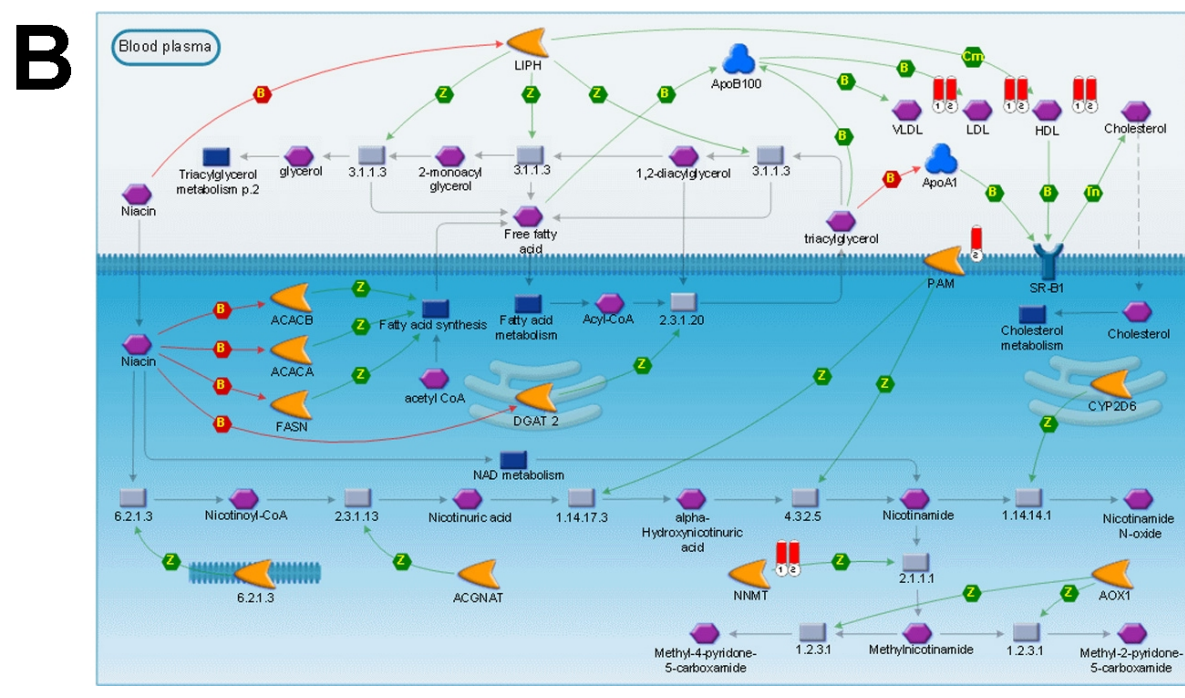

**Figure S6. Characterization of xenografts derived from MCFDCIS cells and co-injected non-epithelial cells.** Scale bars correspond to 100  $\mu\text{m}$  in all panels. **A:** Immuno-FISH using pan-cytokeratin antibody (panCK-blue) identifies epithelial cells. The overlay demonstrates the human origin of cytokeratin positive epithelial cells and the mouse origin of stromal cells. **B:** Immuno-FISH using smooth muscle actin antibody (SMA-blue) identifies myoepithelial cells or myofibroblasts. The overlay demonstrates the human origin of SMA-positive myoepithelial cells (yellow arrows) in DCIS structures and the mouse origin of SMA-positive myofibroblasts (yellow stars).

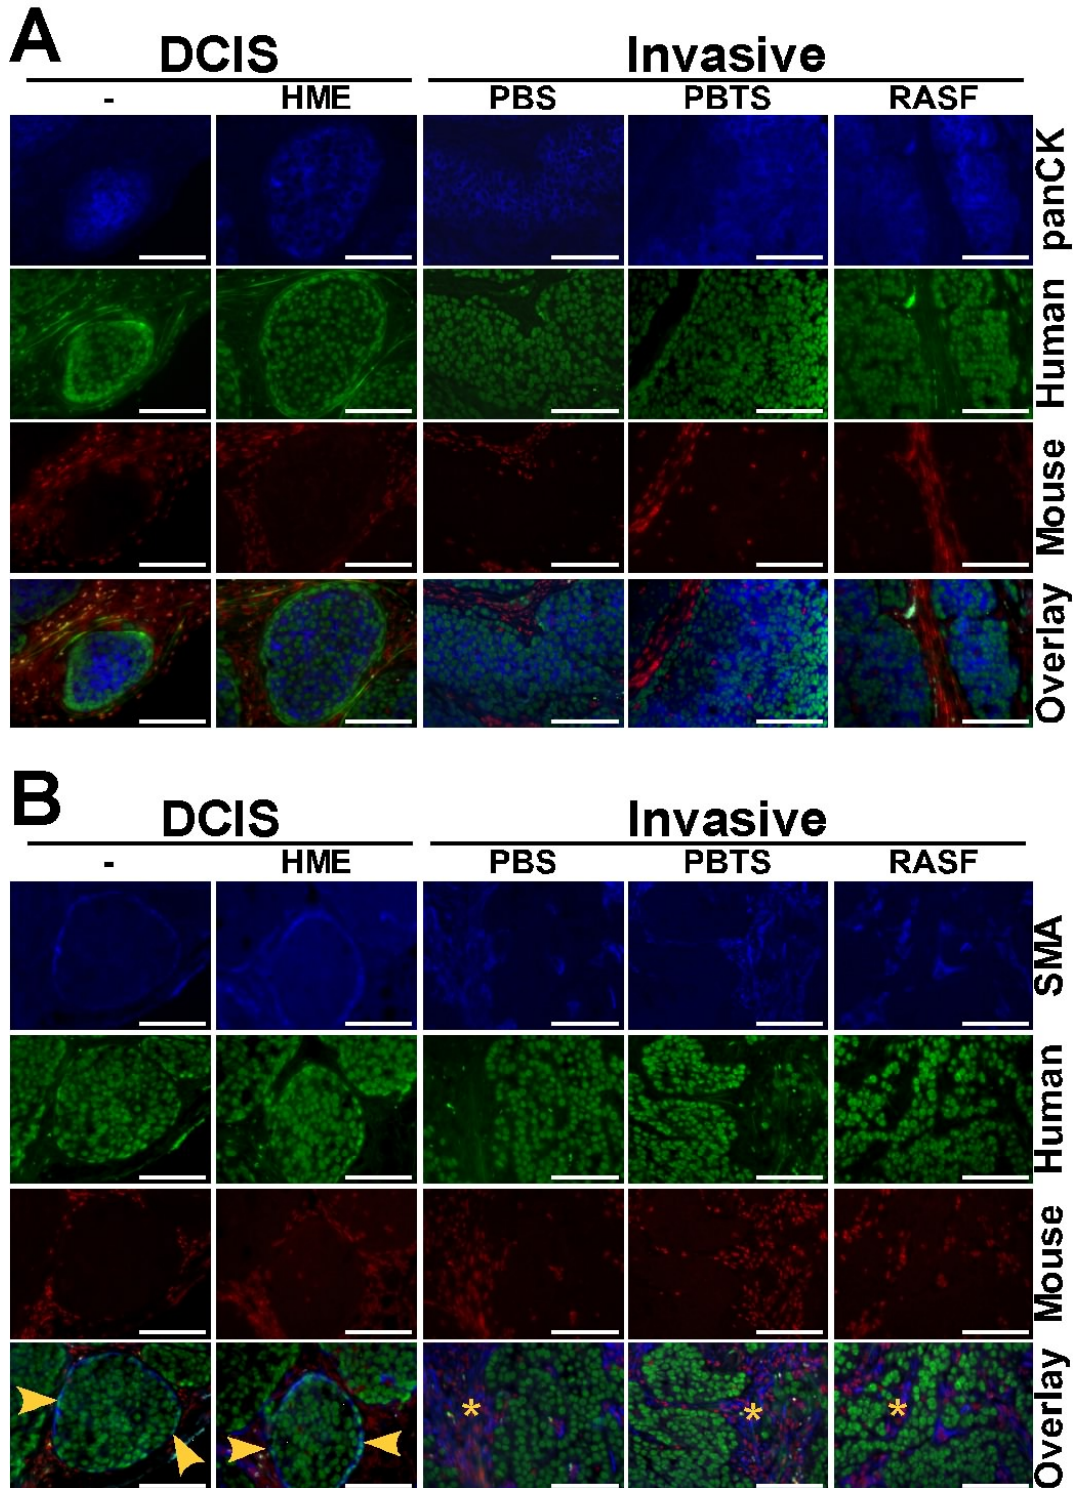

**Figure S7. Validation of shRNA clones.** shRNA clones highlighted in red were used for xenograft studies. **A:** Quantitative RT-PCR analysis of SMAD4 mRNA levels in control shGFP and SMAD4 shRNA clones. Inset is western blot analysis of SMAD4 protein levels. **B:** Quantitative RT-PCR analysis of TGFBR2 mRNA levels in control shGFP and TGFBR2 shRNA clones. Inset is western blot analysis of TGFBR2 protein levels. **C:** Semi-quantitative RT-PCR analysis of GLI2 mRNA levels in control shGFP and GLI2 shRNA clones. Right panel is western blot analysis of Gli2 protein levels. **D:** Western blot analysis of the indicated proteins in control and Gli2, SMAD4, and TGFBR2 shRNA clones. **E:** TGF $\beta$  and Gli activity determined using luciferase reporters in the indicated MCFDCIS derivatives and treatment conditions. Error bars represent mean  $\pm$  SD.

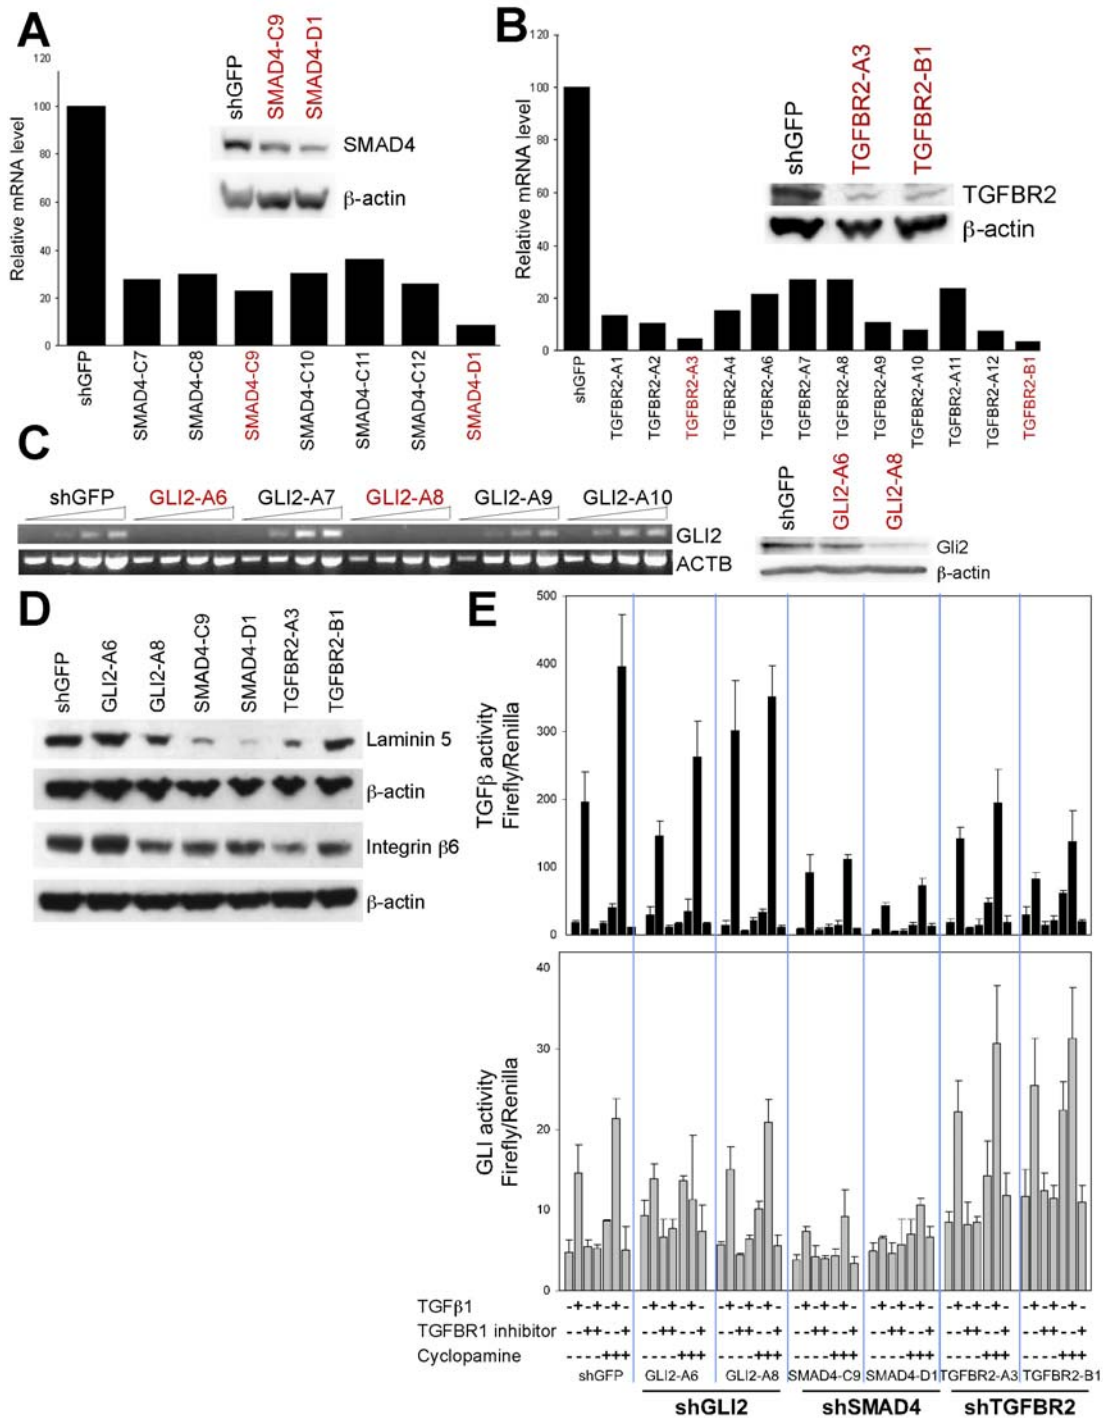

**Figure S8. Luciferase assays and xenograft results. A:** Quantitative RT-PCR analysis of MMP14 mRNA levels in control pRET-GFP and clones overexpressing wild-type (MMP14-HA) or inactive mutant (MMP14 E/A) MMP14. Right panel is western blot analysis of MMP14 protein levels. **B:** Luciferase activity assessing TGF $\beta$  and Gli activity in control and MMP14 overexpressing MCFDCIS cells following the indicated treatments. Error bars represent mean  $\pm$  SD. **C:** Quantitative RT-PCR analysis of MMP14 mRNA levels in control shGFP and MMP14 shRNA clones. **D:** The effect of decreased MMP14 levels on the histology of MCFDCIS xenografts. Xenografts derived from shMMP14 clones lack myoepithelial cells and have invasive phenotype. **E:** Histology and SMA and p63 expression in xenografts derived from vector control (pBabe) and  $\Delta$ Np63 $\alpha$  overexpressing MCFDCIS cells. Despite its widespread overexpression in 2D culture, in xenografts only the myoepithelial cells are positive for p63 suggesting its post-transcriptional downregulation in luminal epithelial cells potentially due to their lack of contact with the basement membrane. Scale bars correspond to 100  $\mu$ m in all panels.

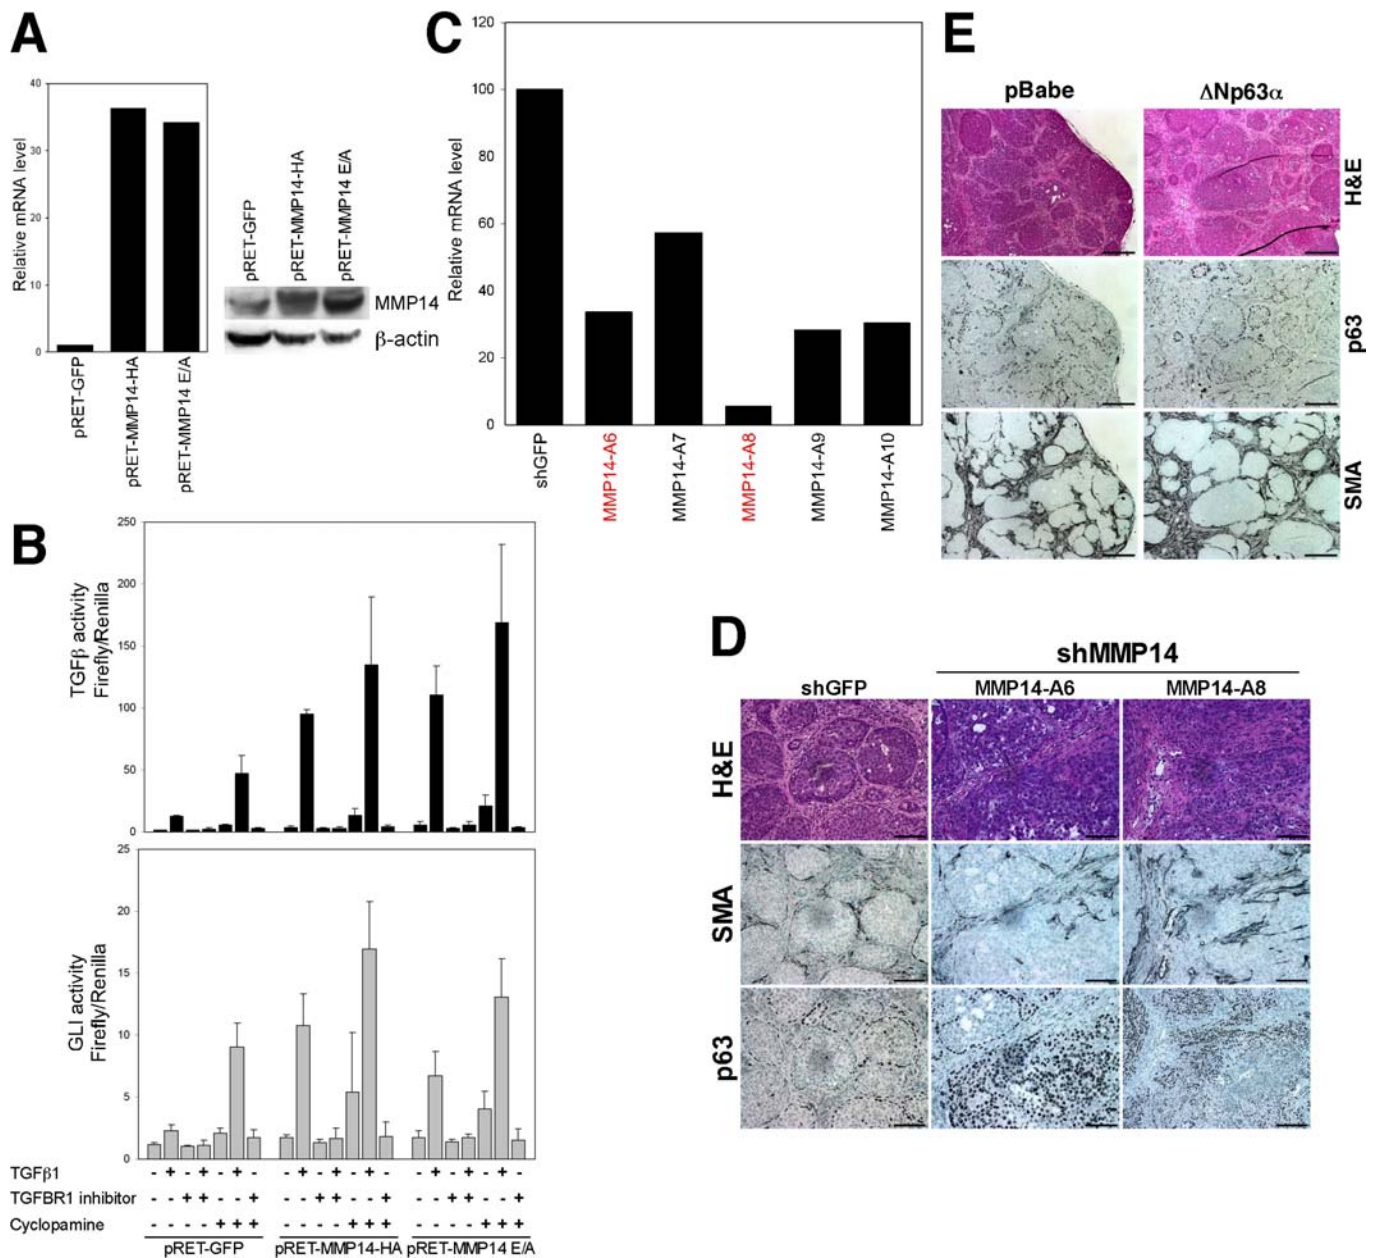

## References:

- Cai, L., Huang, H., Blackshaw, S., Liu, J. S., Cepko, C., and Wong, W. H. (2004). Clustering analysis of SAGE data using a Poisson approach. *Genome Biol* 5, R51.
- Eisen, M. B., Spellman, P. T., Brown, P. O., and Botstein, D. (1998). Cluster analysis and display of genome-wide expression patterns. *Proc Natl Acad Sci U S A* 95, 14863-14868.
- Husemann, Y., Geigl, J. B., Schubert, F., Musiani, P., Meyer, M., Burghart, E., Forni, G., Eils, R., Fehm, T., Riethmuller, G., and Klein, C. A. (2008). Systemic spread is an early step in breast cancer. *Cancer Cell* 13, 58-68.
- Ney, P. A., Andrews, N. C., Jane, S. M., Safer, B., Purucker, M. E., Weremowicz, S., Morton, C. C., Goff, S. C., Orkin, S. H., and Nienhuis, A. W. (1993). Purification of the human NF-E2 complex: cDNA cloning of the hematopoietic cell-specific subunit and evidence for an associated partner. *Mol Cell Biol* 13, 5604-5612.
- Peters, B. A., Diaz, L. A., Polyak, K., Meszler, L., Romans, K., Guinan, E. C., Antin, J. H., Myerson, D., Hamilton, S. R., Vogelstein, B., *et al.* (2005). Contribution of bone marrow-derived endothelial cells to human tumor vasculature. *Nat Med* 11, 261-262.
